# Supplementary material for: Reductive decomplexation of π-allyltricarbonyliron lactone complexes; a new route to stereo-defined 1,7-diols and 2,3-diene-1,7-diols
Source: Royal Society of Chemistry journal article supplement (doi:10.1039/b206406p), 2002-01-01
Supplement: b206406p.doc [file b206406p.doc]

Supplementary Material (ESI) for Chemical Communications

This journal is © The Royal Society of Chemistry 2002

Supplementary information for Communication reference B206406P

Title

Reductive Decomplexation of -allyltricarbonyliron lactone complexes: A new route to stereo-defined 1,7-diols and 2,3-diene-1,7-diols.

C.J. Hollowood and Steven V. Ley*

General Experimental

1H nmr spectra were recorded in CDCl3 or C6D6 on Bruker DRX-600 or DRX-400 spectrometers and are reported as follows: chemical shift,  (ppm) [number of protons, multiplicity, coupling constant *J* (Hz), and assignment]. Residual protic solvent CHCl3 (**H = 7.26 ppm) or C6H6 (**H = 7.20 ppm) was used as the internal reference. 13C nmr spectra were recorded in CDCl3 or C6D6 at 150 MHz or 100 MHz on Bruker DRX-600 or DRX-400 or spectrometers, using the central resonance of CDCl3 (**C = 77.0 ppm) or C6D6 (**C = 128.0 ppm) as the internal reference. In distortionless enhancement by polarisation transfer experiments (DEPT135) signals with an odd number of protons attached are designated (–) and those with an even number (+). For those cases where an inseperable mixture of compounds was produced, the data reported was obtained on the mixture. Infra-red spectra were recorded on Perkin-Elmer 983G, FTIR 1620 or Perkin Elmer ATR Spectrum 1 spectrometers. Mass spectra were obtained on Kratos MS890MS, Bruker BIOAPEX 4.7 T FTICR or Micromass Q-TOF spectrometers at the Department of Chemistry, University of Cambridge. The following ionisation techniques were used: electron ionisation (EI), chemical ionisation (CI), fast atom bombardment (FAB) and electrospray (ES). Optical rotation measurements are reported in 10-1 deg cm2 g-1; concentration (c.) is in g/100ml. Flash column chromatography was carried out using Merck Kieselgel (230-400 mesh) unless otherwise indicated. Analytical thin layer chromatography was performed using precoated glass-backed plates (Merck Kieselgel 60 F254) and visualised by ultraviolet, acidic ammonium molybdate (IV) or acidic potassium permanganate solutions. Aqueous solutions were saturated unless otherwise specified. Petrol refers to petroleum ether boiling point 40‑60 ˚C. In cases where mixtures of solvents were utilised, the ratios given refer to the volumes used. All reactions were carried out under an argon atmosphere in oven-dried glassware, which was cooled under a continuous stream of argon immediately prior to use unless otherwise stated. Et2O and THF were distilled from sodium benzophenone ketyl. CH2Cl2 and PhMe were distilled from calcium hydride.

General Procedures.

A - NaBH4 reduction.

For a 0.50 mmol scale reaction: To a solution of the ketone in CH2Cl2 (4 cm3) at –78 ˚C was added a pre‑cooled (–78 ˚C) solution of NaBH4 (10 eq) in MeOH (4 cm3) *via* cannula and the reaction stirred at this temperature for 2 hours. A pre‑cooled (–78 ˚C) solution of AcOH (2 cm3) and THF (10 cm3) was added *via* cannula, the mixture poured onto NaHCO3 solution (40 cm3) and extracted with Et2O (2  15 cm3). The combined organic fractions were washed with brine and dried (MgSO4). Concentration of the filtrate *in vacuo* followed by flash column chromatography afforded the alcohol.

B - acetate protection of alcohols.

For a 0.5 mmol scale reaction: To a solution of the alcohol (1.0 eq), NEt3 (1.3 eq) and DMAP (0.1 eq) in CH2Cl2 (5 cm3) at 0 ˚C was added Ac2O (1.1 eq). The reaction was allowed to warm to room temperature, stirred for 2 hours, filtered through a pad of silica and the residue washed with Et2O (50 cm3). Concentration of the filtrate in vacuo afforded the acetate which was used without further purification.

C - Al(*i‑*Bu)3 reduction.

For a 1.0 mmol scale reaction: To a solution of the ketone (1.0 eq) in CH2Cl2 (6 cm3) at 0 ˚C was added Al(*i‑*Bu)3 (2.0 eq, 1 moldm‑3 in PhMe) dropwise. After 30 min the solution was poured onto pre‑cooled (0 ˚C) 1 mol dm–3 aqueous HCl solution (30 cm3) and stirred vigourously for 20 min. CH2Cl2 (20 cm3) was added and the layers separated. The aqueous was extracted with Et2O (30 cm3) and the combined organic fractions were washed with brine and dried (MgSO4). Concentration of the filtrate *in vacuo* followed by flash column chromatography afforded the tertiary or secondary alcohol respectively.

D - formation of cyclic carbonates.

For a 0.30 mmol scale reaction: To a solution of the alcohol and DMAP (0.1 eq) in CH2Cl2 (3 cm3) at room temperature was added CDI (3.0 eq) in one portion. After 1 hour the reaction mixture was purified directly by flash column chromatography to afford the carbonate.

E - cuprate decomplexaion and diene reduction.

For a 0.20 mmol scale reaction: To a suspension of CuI (5.0 eq) in THF (5 cm3) at –78 ˚C was added MeLi (10 eq, 1.4 mol dm–3 in Et2O) dropwise. After complete addition the solution was warmed to 0 ˚C and cooled back to –78 ˚C and then the alcohol (1.0 eq) in THF (1 cm3) was added dropwise. The reaction mixture stirred at –78 ˚C overnight, allowed to warm to room temperature, then poured onto NH4Cl solution and extracted with Et2O (2  10 cm3). The combined organic fractions were washed with brine and dried (MgSO4). Concentration of the filtrate *in vacuo* followed by flash column chromatography afforded a mixture of dienols. Pd/C (1.0 eq by weight, 10 wt. % Pd (dry basis) on activated carbon) was suspended in a solution of the dienol mixture in EtOAc (5 cm3). The mixture was purged 5 times with H2 and stirred under an atmosphere of H2. After 2 hours the mixture was filtered and concentrated *in vacuo* to afford the reduced product without any further purification.

Preparation of lithium naphthalenide solution.

A suspension of naphthalene (6.5g, 50.7 mmol) and lithium (1.15g, 50.0 mmol, ~30 wt. % dispersion in mineral oil) in THF (50 cm3) was sonicated for 30 min to yield a dark green solution (~1 moldm‑3).

F - lithium naphthalenide decomplexation.

For a 0.20 mmol scale reaction: To a solution of the acetate (1.0 eq) in THF (5 cm3) at –78 ˚C was added lithium naphthalenide (5.0 eq) and the reaction stirred at this temperature overnight. The mixture was allowed to warm to room temperature and filtered through a pad of silica. The residue was washed with Et2O (50 cm3) and the filtrate concentrated *in vacuo*. The crude product was purified by flash column chromatography to afford a mixture of dienols.

G - lithium naphthalenide decomplexation and reduction.

For a 0.20 mmol scale reaction: To a solution of the acetate (1.0 eq) in THF (5 cm3) at –78 ˚C was added lithium naphthalenide (5.0 eq) and the reaction stirred at this temperature overnight. The mixture was allowed to warm to room temperature and filtered through a pad of silica. The residue was washed with Et2O (50 cm3) and the filtrate concentrated *in vacuo*. The crude product was purified by flash column chromatography to afford a mixture of dienols. Pd/C (1.0 eq by weight, 10 wt. % Pd (dry basis) on activated carbon) was suspended in a solution of the dienol mixture in EtOAc (5 cm3). The mixture was purged 5 times with H2 and stirred under an atmosphere of H2. After 2 hours the mixture was filtered and concentrated *in vacuo* to afford the reduced product without any further purification.

H - decomplexation, acetate cleavage and diene reduction.

For a 0.20 mmol scale reaction: To a solution of the acetate (1.0 eq) in THF (5 cm3) at –78 ˚C was added lithium naphthalenide (10 eq) and the reaction stirred at this temperature overnight. The mixture was allowed to warm to room temperature, MeOH (5 cm3) was added and the reaction stirred for a further 2 hours before being filtered through a pad of silica. The residue was washed with Et2O (50 cm3) and the filtrate concentrated *in vacuo*. The crude product was purified by flash column chromatography to afford a mixture of dienols. Pd/C (1.0 eq by weight, 10 wt. % Pd (dry basis) on activated carbon) was suspended in a solution of the dienol mixture in EtOAc (5 cm3). The mixture was purged 5 times with H2 and stirred under an atmosphere of H2. After 2 hours the mixture was filtered and concentrated *in vacuo* to afford the reduced product without any further purification.

I - Pd/C catalysed reduction of dienes.

For a 0.5 mmol scale reaction: Pd/C (1.0 eq by weight, 10 wt. % Pd (dry basis) on activated carbon) was suspended in a solution of the alkene in EtOAc (5 cm3). The mixture was purged 5 times with H2 and stirred under an atmosphere of H2. After 2 hours the mixture was filtered through a pad of Celite and the residue washed with EtOAc (50 cm3). Concentrated of the filtrate *in vacuo* afforded the alkane which required no further purification.
